# Supplementary material
Source: publisher site journal article supplement (https://www.dovepress.com/article/259601)
Supplement: Supplementary file 1 [file get_supplementary_file.php]

Supplementary Material

**Table S1**. Sequence of the primers used for in the study

| Probe name | Forward | Reverse |
| --- | --- | --- |
| RP11-160E2.19 | TGATTGAGTCCTGTACCGTGC | GGGTCTTCACACCCTTGAGT |
| LUCAT1 | ACACCCAGGAATCCAACTTGC | GATGAGGACAGCATTTGGACAC |
| LINC01108 | TGCTGCTTCCAGGAGTGAGTG | ACGCTGAGTGACGATTGGG |
| LY86-AS1 | TGAGTTGCGGGAGTTGTGTG | GATTCCACTTGACTCTGTTCGG |
| G063948 | AGTAACAGGCATTGGGAAGGG | GGCAAGTTGTCCACAGGTGAC |
| RP5-1158E12.1 | ATGGAAGAACAACTGCCTAAGC | CCAGAACTCTTCATTCATTGCG |
| G052118 | GCTTGGGCACAGGAGATG | GCTGTTCTGTGTCTGTGACT |
| G057815 | GTGCTTAGATGACTTTGCATTCC | GTCCATGTCTCAGCTCACATC |
| uc.128- | TCTGTCCCCAGTCATCCCATA | AATCCTTAATTGGACTCCAGGAGAG |
| G089388 | AGAAGGTGGAATTCAAACGGAGT | TGGACAGCACCTCTGAACCC |
| HOXA-AS2 | ACCGATGATGAGCCCTGATG | TGCTCCAAAACTCTTCGCC |
| Notch1 | TGCTTCCAGAGTGCCACCGA | GTCTCACTCTGCACGGCCTC |
| GADPH | ACAGCCTCAAGATCATCAGC | GGTCATGAGTCCTTCCACGAT |

**Table S2**. The characteristics of the patients recruited for verification of microarray results

| Characteristics | No COPD | COPD |
| --- | --- | --- |
| Number of subjects | 10 | 15 |
| Age | 53.60±13.99 | 58.47±9.08 |
| Sex, male | 5 | 13 |
| Pack-years | 10.50±16.06 | 37.67±21.70 |
| FEV1(% predicted) | 93.04±14.00 | 72.30±16.86 |
| FEV1/FVC | 77.08±4.67 | 62.05±6.19 |

Data are presented as mean ± SD.

Abbreviations: COPD, chronic obstructive pulmonary disease; FEV1, forced expiratory volume in 1 second; FVC, forced vital capacity

**Figure S1** The representative images of HOXA-AS2 overexpression lentivectors transfection in different MOI


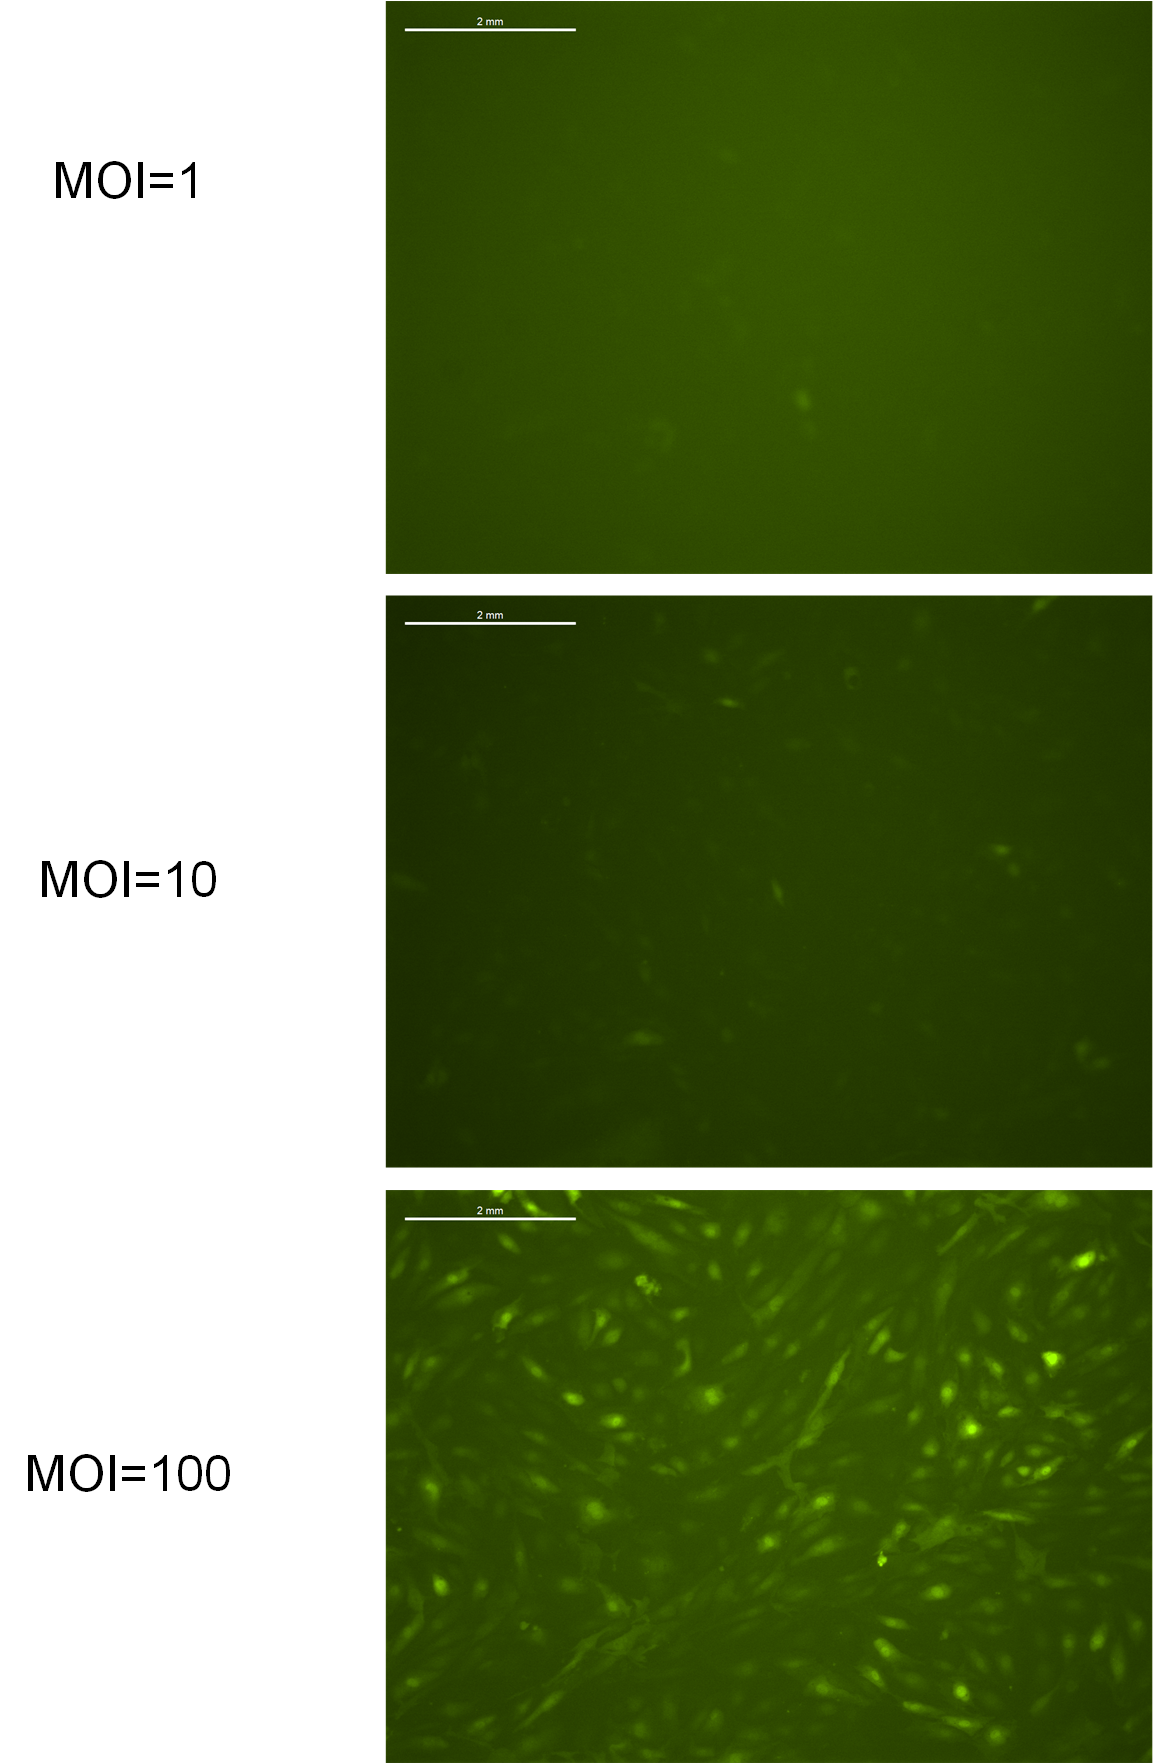


**Figure S1** The representative images of HOXA-AS2 overexpression lentivectors transfection in different multiplicity of infection (MOI). The HOXA-AS2-GFP (Green fluorescent protein) lentivectors were co-cultured with endothelial cells in different MOI. Only when MOI=100, HOXA-AS2 overexpression lentivectors were transfected into more than 80% endothelial cells. All experiments were performed independently at least 3 times.


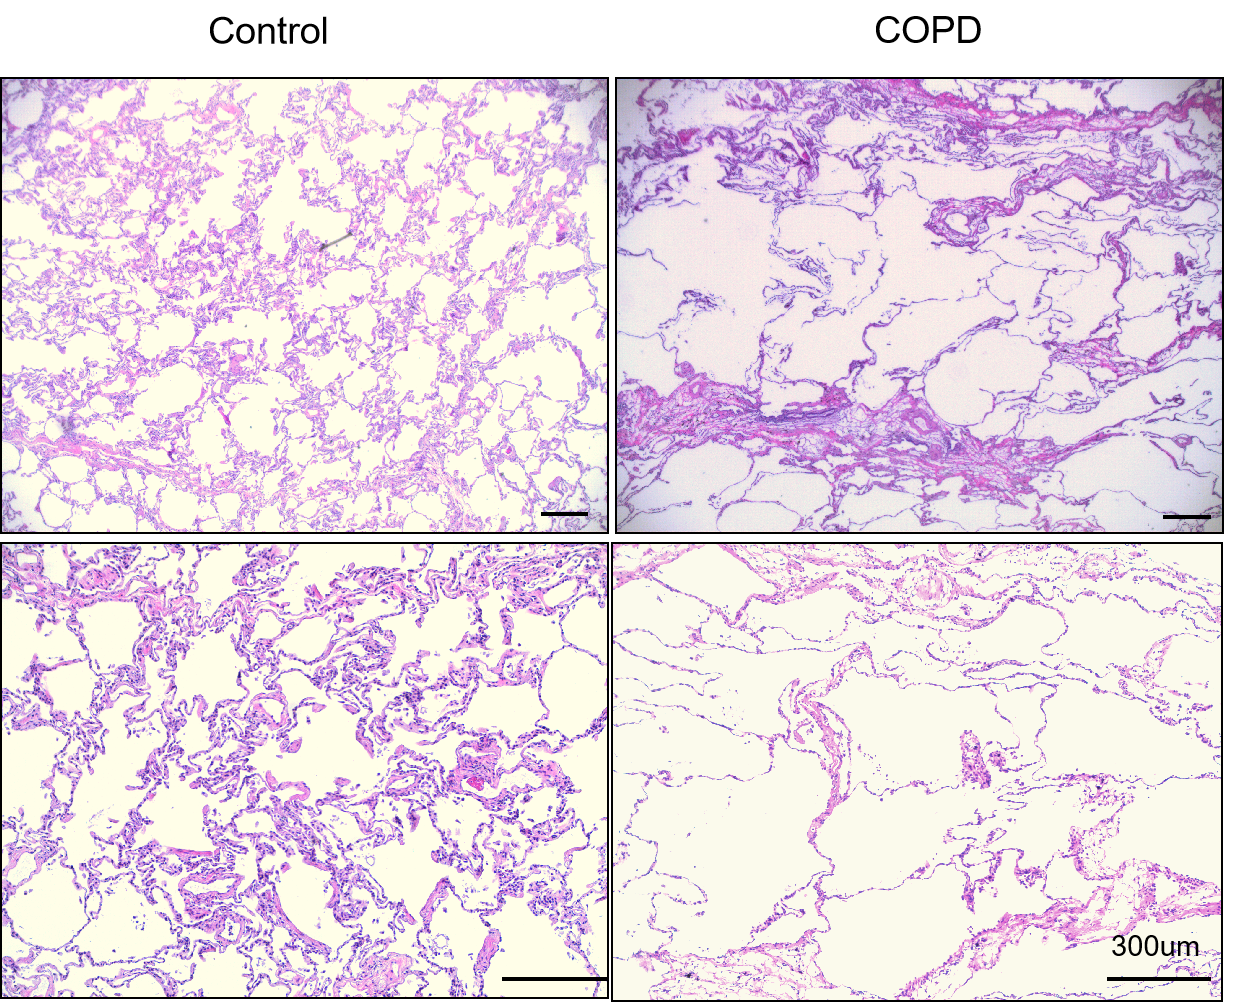
**Figure S2** Thehematoxylin-eosin (HE) staining of COPD lung tissues

**Figure S2** Thehematoxylin-eosin (HE) staining of COPD lung tissues. HE-stained lung tissue sections showed a much more severe emphysema in patients with COPD. Original magnification: (upper)40× and (lower)100×, Bars: 300um.

**Figure S3** The effect of silencing HOXA-AS2 on expression of VEGF, Fli1 and Wnt3a.
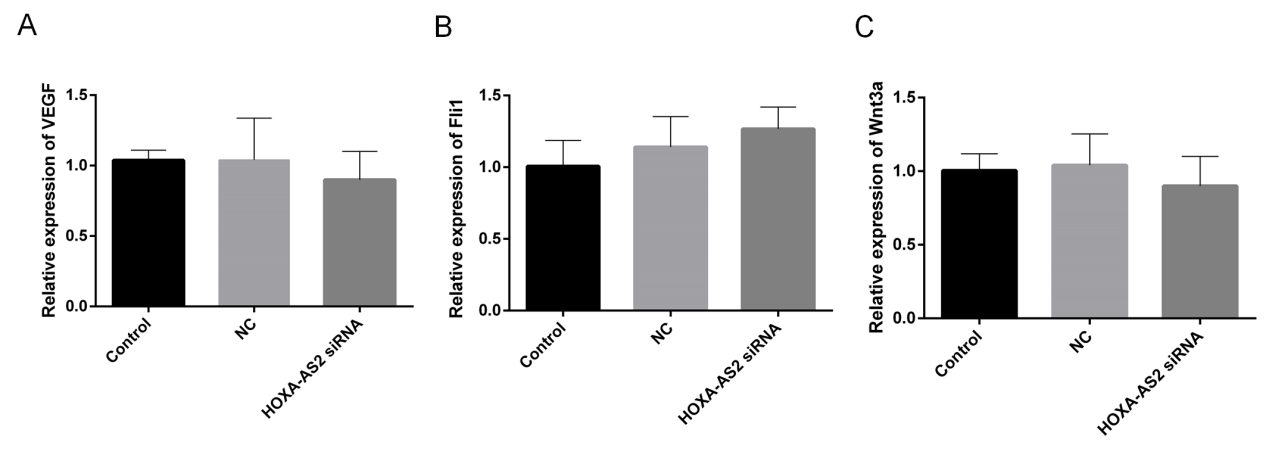


**Figure S3** The effect of silencing HOXA-AS2 on expression of VEGF, Fli1 and Wnt3a. HPMECs was transfected with HOXA-AS2 siRNA for 24 hours, then the relative expression levels of VEGF(A), Fli1(B) and Wnt3a(C)was detected by Real-time PCR. All experiments were performed independently at least 3 times. HPMECs, human pulmonary microvascular endothelial cells; Real Time-PCR, Real-time polymerase chain reaction.
